# Supplementary material for: A picture is worth a thousand words: maps of HIV indicators to inform research, programs, and policy from NA-ACCORD and CCASAnet clinical cohorts
Source: PubMed Central journal article supplement (PMC4821890; doi:10.7448/ias.19.1.20707), 2016-04-04
Supplement: JIAS-19-20707-s001.pdf [file JIAS-19-20707-s001.pdf]

**ADDITIONAL FILES**

**Supplemental Table 1.** Complete distributions of CCASAnet and NA-ACCORD clinical populations contributing to HIV indicators by country, state, territory, and province mapped.

| <b>Jurisdiction</b>      | <b>Median CD4 at Entry</b> | <b>N=14,811</b> | <b>(%)</b> | <b>Percent Retained</b> | <b>N=87,979</b> | <b>(%)</b> | <b>Percent on ART</b> | <b>N=84,757</b> | <b>(%)</b> | <b>Percent Virally Suppressed</b> | <b>N=51,118</b> | <b>(%)</b> |
|--------------------------|----------------------------|-----------------|------------|-------------------------|-----------------|------------|-----------------------|-----------------|------------|-----------------------------------|-----------------|------------|
| <b>Argentina</b>         | 284                        | 399             | (3)        | 60                      | 2,630           | (3)        | 83                    | 2,667           | (3)        | 79                                | 2,563           | (5)        |
| <b>Brazil</b>            | 253                        | 400             | (3)        | 75                      | 2,735           | (3)        | 86                    | 2,809           | (3)        | 79                                | 2,768           | (5)        |
| <b>Chile</b>             | 267                        | 527             | (4)        | 76                      | 1,705           | (2)        | 78                    | 1,969           | (2)        | 74                                | 1,797           | (4)        |
| <b>Haiti<sup>a</sup></b> | 216                        | 1493            | (10)       | 86                      | 5,271           | (6)        | *                     | 0               | (0)        | *                                 | 0               | (0)        |
| <b>Honduras</b>          | 163                        | 129             | (1)        | 78                      | 652             | (1)        | 84                    | 449             | (1)        | 87                                | 394             | (1)        |
| <b>Mexico</b>            | 127                        | 188             | (1)        | 87                      | 739             | (1)        | 90                    | 793             | (1)        | 88                                | 785             | (2)        |
| <b>Peru</b>              | 175                        | 1014            | (7)        | 66                      | 2,070           | (2)        | 77                    | 2,576           | (3)        | 71                                | 2,555           | (5)        |
| <b>United States</b>     | 341                        | 9685            | (65)       | 73                      | 64,073          | (73)       | 67                    | 72,808          | (86)       | 78                                | 38,835          | (76)       |
| <b>Northeast</b>         |                            |                 |            |                         |                 |            |                       |                 |            |                                   |                 |            |
| <b>CT</b>                | *                          | †               | (0)        | 89                      | 187             | (0)        | 74                    | 211             | (0)        | 93                                | 121             | (0)        |
| <b>MA</b>                | 342                        | 143             | (1)        | 79                      | 1,529           | (2)        | 29                    | 1,727           | (2)        | 79                                | 717             | (1)        |
| <b>ME</b>                | *                          | †               | (0)        | *                       | 61              | (0)        | *                     | 63              | (0)        | *                                 | 17              | (0)        |
| <b>NH</b>                | *                          | †               | (0)        | *                       | 41              | (0)        | *                     | 47              | (0)        | *                                 | 18              | (0)        |
| <b>NJ</b>                | *                          | 14              | (0)        | 77                      | 484             | (1)        | 68                    | 529             | (1)        | 83                                | 279             | (1)        |
| <b>NY</b>                | 400                        | 1068            | (7)        | 84                      | 7,063           | (8)        | 52                    | 7,538           | (9)        | 77                                | 4,220           | (8)        |
| <b>PA</b>                | 332                        | 302             | (2)        | 73                      | 3,060           | (4)        | 59                    | 3,338           | (4)        | 77                                | 1,914           | (4)        |
| <b>RI</b>                | *                          | †               | (0)        | *                       | 64              | (0)        | *                     | 74              | (0)        | *                                 | 39              | (0)        |
| <b>VT</b>                | *                          | 0               | (0)        | *                       | 15              | (0)        | *                     | 19              | (0)        | *                                 | †               | (0)        |
| <b>Midwest</b>           |                            |                 |            |                         |                 |            |                       |                 |            |                                   |                 |            |
| <b>IA</b>                | *                          | †               | (0)        | *                       | 77              | (0)        | *                     | 81              | (0)        | *                                 | 33              | (0)        |
| <b>IL</b>                | *                          | 53              | (0)        | 73                      | 1,507           | (2)        | 71                    | 1,593           | (2)        | 87                                | 931             | (2)        |
| <b>IN</b>                | *                          | †               | (0)        | 78                      | 257             | (0)        | 81                    | 272             | (0)        | 88                                | 134             | (0)        |
| <b>KS</b>                | *                          | †               | (0)        | *                       | 69              | (0)        | *                     | 71              | (0)        | *                                 | 37              | (0)        |
| <b>MI</b>                | *                          | †               | (0)        | 75                      | 378             | (0)        | 73                    | 410             | (1)        | 78                                | 196             | (0)        |
| <b>MN</b>                | *                          | †               | (0)        | 94                      | 125             | (0)        | 82                    | 140             | (0)        | *                                 | 53              | (0)        |
| <b>MO</b>                | *                          | †               | (0)        | 76                      | 294             | (0)        | 79                    | 322             | (0)        | 80                                | 151             | (0)        |
| <b>ND</b>                | *                          | 0               | (0)        | *                       | 16              | (0)        | *                     | 16              | (0)        | *                                 | †               | (0)        |
| <b>NE</b>                | *                          | †               | (0)        | *                       | 59              | (0)        | *                     | 67              | (0)        | *                                 | 64              | (0)        |
| <b>OH</b>                | 313                        | 115             | (1)        | 77                      | 1,497           | (2)        | 76                    | 1,638           | (2)        | 77                                | 899             | (2)        |

|                       |     |      |     |    |        |      |    |        |      |    |       |     |
|-----------------------|-----|------|-----|----|--------|------|----|--------|------|----|-------|-----|
| <b>SD</b>             | *   | †    | (0) | *  | 29     | (0)  | *  | 30     | (0)  | *  | 13    | (0) |
| <b>WI</b>             | *   | †    | (0) | 70 | 110    | (0)  | 78 | 121    | (0)  | *  | 93    | (0) |
| <b>South</b>          |     |      |     |    |        |      |    |        |      |    |       |     |
| <b>AL</b>             | 319 | 483  | (3) | 72 | 2,300  | (3)  | 77 | 2,533  | (3)  | 79 | 1,639 | (3) |
| <b>AR</b>             | *   | †    | (0) | 68 | 185    | (0)  | 77 | 197    | (0)  | *  | 92    | (0) |
| <b>DC</b>             | 368 | 126  | (1) | 69 | 1,192  | (1)  | 70 | 1,293  | (2)  | 73 | 528   | (1) |
| <b>DE</b>             | *   | 0    | (0) | *  | 78     | (0)  | *  | 85     | (0)  | *  | 37    | (0) |
| <b>FL</b>             | 288 | 394  | (3) | 73 | 4,531  | (5)  | 63 | 4,857  | (6)  | 86 | 3,075 | (6) |
| <b>GA</b>             | *   | 56   | (0) | 68 | 1,374  | (2)  | 76 | 1,474  | (2)  | 79 | 812   | (2) |
| <b>KY</b>             | *   | 10   | (0) | 72 | 267    | (0)  | 80 | 282    | (0)  | 82 | 153   | (0) |
| <b>LA</b>             | *   | 11   | (0) | 63 | 365    | (0)  | 76 | 406    | (1)  | 76 | 209   | (0) |
| <b>MD</b>             | 283 | 481  | (3) | 71 | 3,563  | (4)  | 72 | 4,053  | (5)  | 79 | 2,226 | (4) |
| <b>MS</b>             | *   | 10   | (0) | 64 | 267    | (0)  | 79 | 284    | (0)  | 69 | 124   | (0) |
| <b>NC</b>             | 300 | 196  | (1) | 73 | 2,186  | (3)  | 83 | 2,389  | (3)  | 80 | 1,259 | (3) |
| <b>OK</b>             | *   | †    | (0) | 21 | 179    | (0)  | 83 | 194    | (0)  | 95 | 102   | (0) |
| <b>SC</b>             | *   | 10   | (0) | 65 | 488    | (1)  | 76 | 536    | (1)  | 79 | 274   | (1) |
| <b>TN</b>             | 314 | 337  | (2) | 75 | 2,906  | (3)  | 70 | 3,282  | (4)  | 78 | 1,960 | (4) |
| <b>TX</b>             | 233 | 871  | (6) | 74 | 7,070  | (8)  | 75 | 7,469  | (9)  | 76 | 4,620 | (9) |
| <b>VA</b>             | 327 | 118  | (1) | 67 | 932    | (1)  | 75 | 1,029  | (1)  | 75 | 366   | (1) |
| <b>WV</b>             | *   | †    | (0) | 55 | 115    | (0)  | 80 | 124    | (0)  | *  | 40    | (0) |
| <b>West</b>           |     |      |     |    |        |      |    |        |      |    |       |     |
| <b>AK</b>             | *   | 0    | (0) | *  | †      | (0)  |    | †      | (0)  | *  | †     | (0) |
| <b>AZ</b>             | *   | †    | (0) | 73 | 456    | (1)  | 8  | 495    | (1)  | 85 | 196   | (0) |
| <b>CA</b>             | 362 | 1033 | (7) | 69 | 10,119 | (12) | 68 | 11,029 | (13) | 78 | 4,504 | (9) |
| <b>CO</b>             | *   | 55   | (0) | 71 | 1,046  | (1)  | 75 | 1,074  | (1)  | 80 | 406   | (1) |
| <b>HI</b>             | *   | 0    | (0) | *  | †      | (0)  | *  | †      | (0)  | *  | †     | (0) |
| <b>ID</b>             | *   | 0    | (0) | *  | 43     | (0)  | *  | 45     | (0)  | *  | 16    | (0) |
| <b>MT</b>             | *   | 0    | (0) | *  | †      | (0)  | *  | †      | (0)  | *  | †     | (0) |
| <b>NM</b>             | *   | 0    | (0) | 88 | 106    | (0)  | 87 | 111    | (0)  | *  | 45    | (0) |
| <b>NV</b>             | *   | 10   | (0) | 55 | 260    | (0)  | 89 | 285    | (0)  | *  | 85    | (0) |
| <b>OR</b>             | *   | 99   | (1) | 77 | 798    | (1)  | 59 | 840    | (1)  | 87 | 392   | (1) |
| <b>UT</b>             | *   | †    | (0) | *  | 64     | (0)  | *  | 68     | (0)  | *  | 43    | (0) |
| <b>WA</b>             | 352 | 140  | (1) | 68 | 1,805  | (2)  | 79 | 1,892  | (2)  | 76 | 877   | (2) |
| <b>WY</b>             | *   | 0    | (0) | *  | 10     | (0)  | *  | 12     | (0)  | *  | †     | (0) |
| <b>Puerto Rico</b>    | *   | 12   | (0) | 73 | 576    | (1)  | 48 | 692    | (1)  | 71 | 331   | (1) |
| <b>Virgin Islands</b> | *   | 0    | (0) | *  | †      | (0)  | *  | †      | (0)  | *  | †     | (0) |

|                       |     |     |     |    |       |     |    |     |     |    |       |     |
|-----------------------|-----|-----|-----|----|-------|-----|----|-----|-----|----|-------|-----|
| <b>Canada</b>         | 285 | 976 | (7) | 85 | 8,104 | (9) | 79 | 687 | (1) | 77 | 1,413 | (3) |
| <b>East</b>           |     |     |     |    |       |     |    |     |     |    |       |     |
| <b>NB</b>             | *   | 0   | (0) | *  | 0     | (0) | *  | 0   | (0) | *  | 0     | (0) |
| <b>NL</b>             | *   | 0   | (0) | *  | 0     | (0) | *  | 0   | (0) | *  | 0     | (0) |
| <b>NS</b>             | *   | 0   | (0) | *  | 0     | (0) | *  | 0   | (0) | *  | 0     | (0) |
| <b>ON<sup>a</sup></b> | 300 | 214 | (1) | 77 | 1555  | (2) | *  | 0   | (0) | 77 | 659   | (1) |
| <b>PE</b>             | *   | 0   | (0) | *  | †     | (0) | *  | 0   | (0) | *  | 0     | (0) |
| <b>QC</b>             | 291 | 106 | (1) | 71 | 1,441 | (2) | *  | 0   | (0) | 77 | 551   | (1) |
| <b>West</b>           |     |     |     |    |       |     |    |     |     |    |       |     |
| <b>AB</b>             | *   | 87  | (1) | 86 | 627   | (1) | 79 | 677 | (1) | 75 | 202   | (0) |
| <b>BC<sup>a</sup></b> | 280 | 555 | (4) | 91 | 4441  | (5) | *  | †   | (0) | *  | †     | (0) |
| <b>MB</b>             | *   | 0   | (0) | *  | 0     | (0) | *  | 0   | (0) | *  | 0     | (0) |
| <b>SK</b>             | *   | 0   | (0) | *  | †     | (0) | *  | †   | (0) | *  | 0     | (0) |
| <b>Northern</b>       |     |     |     |    |       |     |    |     |     |    |       |     |
| <b>NT</b>             | *   | 0   | (0) | *  | †     | (0) | *  | 0   | (0) | *  | 0     | (0) |
| <b>NU</b>             | *   | 0   | (0) | *  | 0     | (0) | *  | 0   | (0) | *  | 0     | (0) |
| <b>YK</b>             | *   | 0   | (0) | *  | †     | (0) | *  | 0   | (0) | *  | 0     | (0) |

a. Cohorts representing these countries and provinces either did not contribute data for indicators with missing values, or else used ART receipt as an inclusion criterion and therefore do not contribute to the ART use or viral suppression indicators.

\* <100 individuals contributing in the respective country, state, or province, reflecting an inadequate population to produce a stable estimate of the indicator.

† 1-10 individuals contributing in the respective country, state, or province; the exact count has been omitted to avoid inadvertent disclosure.
